# Supplementary material for: Effectiveness of school-based smoking prevention curricula: systematic review and meta-analysis
Source: HighWire-hosted journal article supplement (doi:10.1136/bmjopen-2014-006976), 2015-03-01
Supplement: bmjopen-2014-006976supp3.pdf [file bmjopen-2014-006976supp3.pdf]

**Online supplementary material C: Table to show longest follow-up, with short term (one year or less) data removed**

| Theoretical orientation of curricula             | Longest follow-up Odds ratios (95% CI) | Longest follow up with short term (1 year or less) data removed Odds ratios (95% CI) |
|--------------------------------------------------|----------------------------------------|--------------------------------------------------------------------------------------|
| Information only                                 | 0.12 (0.00, 14.87)                     | Not estimable                                                                        |
| Social competence                                | 0.65 (0.43, 0.96)                      | 0.65 (0.43, 0.96)                                                                    |
| Social influences                                | 0.92 (0.84, 1.00)                      | 0.93 (0.85, 1.01)                                                                    |
| Combined Social competence and Social influences | 0.60 (0.43, 0.83)                      | 0.52 (0.29, 0.92)                                                                    |
| Multi Modal                                      | 0.88 (0.73, 1.05)                      | 0.88 (0.73, 1.05)                                                                    |
| Overall                                          | 0.88 (0.82, 0.95)                      | 0.90 (0.83, 0.97)                                                                    |
